# Supplementary material for: A highly selective OFF–ON fluorescent sensor for zinc in aqueous solution and living cells
Source: Royal Society of Chemistry journal article supplement (doi:10.1039/c0cc02134b), 2010-01-01
Supplement: c0cc02134b.pdf [file c0cc02134b.pdf]

## Electronic Supplementary Material (ESM) for Publication:

### A Highly Selective OFF-ON Fluorescent Sensor for Zinc in Aqueous Solution and Living Cell

5 Huili Chen,<sup>\*ab</sup> Wei Gao,<sup>a</sup> Miaoli Zhu,<sup>ab</sup> Hongfei Gao,<sup>c</sup> Jinfang Xue,<sup>a</sup> and Yingqi Li<sup>a</sup>

<sup>a</sup> Institute of Molecular Science, Key Laboratory of Chemical Biology and Molecular Engineering of Ministry of Education, Shanxi University, Taiyuan 030006, P.R. China

<sup>b</sup> State Key Laboratory of Coordination Chemistry, Nanjing University, Nanjing 210093, P.R. China

<sup>c</sup> Shanxi Medical University First Hospital, Taiyuan 030001, P.R. China.

Correspondence. E-mail: [huilichen@sxu.edu.cn](mailto:huilichen@sxu.edu.cn) (H.Chen)

#### 15 S1. Materials and general methods

#### S2. Supplementary results

**Fig. S1.** The fluorescence responses ( $I_{500\text{nm}}$ ) of *CI* (20  $\mu\text{M}$ ) with various anions (800  $\mu\text{M}$ ) in Tris-HCl buffer (pH=5.0) 20 ( $\lambda_{\text{ex}} = 295 \text{ nm}$ ).

**Fig. S2.** The fluorescence responses ( $I_{500\text{nm}}$ ) of *CI* (20  $\mu\text{M}$ ) with various amino acids (800  $\mu\text{M}$ ) in Tris-HCl buffer (pH=5.0) ( $\lambda_{\text{ex}} = 295 \text{ nm}$ ).

**Fig. S3.** The fluorescence responses ( $I_{500\text{nm}}$ ) of *CI* (20  $\mu\text{M}$ ) with various metal ions (800  $\mu\text{M}$ ) in Tris-HCl buffer (pH=5.0) ( $\lambda_{\text{ex}} = 295 \text{ nm}$ ).

25 **Fig. S4.** The fluorescence responses ( $I_{500\text{nm}}$ ) of *CI* (20  $\mu\text{M}$ ) with various metal ions and  $\text{Zn}^{2+}$  in Tris-HCl buffer (pH=5.0). ( $\lambda_{\text{ex}} = 295 \text{ nm}$ ). (80  $\mu\text{M}$  for  $\text{Zn}^{2+}$ ,  $\text{Co}^{2+}$ ,  $\text{Cu}^{2+}$ ,  $\text{Fe}^{3+}$ , 800  $\mu\text{M}$  for all other cations).

**Fig. S5.** The fluorescence responses ( $I_{500\text{nm}}$ ) of *CI* (20  $\mu\text{M}$ ) with 20 amino acids and  $\text{Zn}^{2+}$  in Tris-HCl buffer (pH=5.0). ( $\lambda_{\text{ex}} = 295 \text{ nm}$ ). (80  $\mu\text{M}$  for  $\text{Zn}^{2+}$  and amino acids).

**Fig.S6.** Excitation spectrum of *CI*- $\text{Zn}^{2+}$

30 **Fig.S7.** The UV-Vis absorption spectra of *CI* (100  $\mu\text{M}$ ) and *CI* with excess  $\text{Zn}^{2+}$ .

**Fig. S8.** ESI mass spectra of *CI* and *CI* upon addition of excess Zinc (III) chloride.

**Fig. S9** Luminescence of *CI* (20  $\mu\text{M}$ ) at 500 nm in various pH in the absence and presence of 80  $\mu\text{M}$   $\text{Zn}^{2+}$ . The pH of the solutions was adjusted by addition of 0.1 mol L<sup>-1</sup> HCl (or 0.2 mol L<sup>-1</sup> NaOH).

**Fig. S10.** Luminescence of the acidificated MPIP with 1M HCl

**Fig. S11.** The fluorescence intensity of *CI*-Zn<sup>2+</sup> ( $\lambda_{\text{ex}} = 295 \text{ nm}$ ,  $\lambda_{\text{em}} = 500 \text{ nm}$ ) as a function of time ( $\lambda_{\text{ex}}=295 \text{ nm}$ ).

**Fig. S12.** Bright field of confocal fluorescence images of C6 cells in the absence (a) and presence of 50  $\mu\text{M}$  *CI*(b-e) . Cells treated with *CI* in the absence (b) and presence of 8  $\mu\text{M}$  TPEN(c); after treatment with TPEN, 10  $\mu\text{M}$  ZnCl<sub>2</sub> (d) and 100  $\mu\text{M}$  ZnCl<sub>2</sub> (e), subsequent treatment of the cells with 50  $\mu\text{M}$  *CI*

**Fig. S13.** Confocal fluorescence images of C6 cells in the presence of 50  $\mu\text{M}$  *CI* and 50  $\mu\text{M}$  ZnCl<sub>2</sub> .

**Table S1 Hydrogen binds in *CI*·2H<sub>2</sub>O**

**Deleted:** confocal fluorescence images of C6 cells in the presence of 50  $\mu\text{M}$  *CI* treatment with 10  $\mu\text{M}$  ZnCl<sub>2</sub> and 100  $\mu\text{M}$  ZnCl<sub>2</sub> .¶

## 10 S1. Materials and general methods

All the solvents were of analytic grade. The salts solutions of metal ions were NaCl, KCl, MgCl<sub>2</sub>·6H<sub>2</sub>O, CaCl<sub>2</sub>, CrCl<sub>3</sub>·6H<sub>2</sub>O, MnCl<sub>2</sub>·4H<sub>2</sub>O, FeCl<sub>3</sub>·6H<sub>2</sub>O, Co(NO<sub>3</sub>)<sub>2</sub>·6H<sub>2</sub>O, NiCl<sub>2</sub>·6H<sub>2</sub>O, CuCl<sub>2</sub>·2H<sub>2</sub>O, LiCl·H<sub>2</sub>O, ZnCl<sub>2</sub>, Cd(NO<sub>3</sub>)<sub>2</sub>·4H<sub>2</sub>O, PbCl<sub>2</sub>, SnCl<sub>4</sub>·5H<sub>2</sub>O, Al(NO<sub>3</sub>)<sub>3</sub>·9H<sub>2</sub>O, BaCl<sub>2</sub>. The salts solutions of anions were Na<sub>3</sub>PO<sub>4</sub>, Na<sub>2</sub>CO<sub>3</sub>, NaOAc, KBr, K<sub>2</sub>C<sub>2</sub>O<sub>4</sub>·H<sub>2</sub>O, Na<sub>2</sub>S, NaCl, NaF, KNO<sub>3</sub>, KSCN. The other reagents were purchased from Shanghai Reagents Ltd. MPIP was synthesized according to the reference.<sup>R1</sup>

### S1.1 General instruments

<sup>1</sup>H NMR and <sup>13</sup>C NMR spectra were recorded on a Bruker DRX300 spectrometer with DMSO as the internal standard. Electrospray ionization mass spectra (ESI-MS) were measured on a Finnigan LCQ system. UV-Vis spectra were recorded on a Hewlett Packard HP-8453 spectrophotometer. Fluorescence spectra were recorded on Varian Cary Eclipse spectrophotometer. The X-ray data of crystal *CI* were collected by  $\omega$ -scan method on a SMART 1K CCD area detector single-crystal diffractometer that uses graphite monochromated Mo K $\alpha$  radiation ( $\lambda=0.71073 \text{ \AA}$ ). The structure was solved by direct methods and refined by least squares procedures on F<sup>2</sup> using SHELX-97 package.

### S1.2 Procedures of metal ion sensing

Stock solutions of the metal ions (40 mM) and *CI* (2 mM) were prepared in deionized water, respectively. In titration experiments, a 20  $\mu\text{L}$  of *CI* was added into 2 mL of Tris-HCl buffer (0.02 M, pH = 5) filled in a quartz optical cell of 1 cm optical path length, and the Zn<sup>2+</sup> stock solution was added into the quartz optical cell gradually by using a micro-pipettes. The dilution of metal complex concentrations at the end of the titrations was negligible. In selectivity experiments, the test samples were prepared by placing appropriate amounts of metal ion stock into 2.0 mL of Tris-HCl buffer solution of *CI* (20  $\mu\text{M}$ ). For fluorescence measurements, excitation was provided at 295 nm, and emission was collected from 400 to 570 nm. Luminescence quantum yields in air-equilibrated solution were measured with reference to quinine sulfate (0.55 in 0.05 M H<sub>2</sub>SO<sub>4</sub>).

The binding constant was calculated from the emission intensity - titration curve according to the equations (S1a) and (S1b).<sup>R2</sup>

$$\frac{\varepsilon_a - \varepsilon_f}{\varepsilon_b - \varepsilon_f} = \frac{(b - (b^2 - 2K^2C_t[\text{DNA}]/s)^{1/2})}{2KC_t} \quad (\text{S1a})$$

$$b = 1 + KC_t + K[\text{DNA}]/2s \quad (\text{S1b})$$

where  $I$  is the emission intensity observed at a given  $\text{Zn}^{2+}$  concentration,  $I_f$  is the emission intensity of free  $CI$  in solution,  $I_b$  is the emission intensity of  $CI$  when fully bound to  $\text{Zn}^{2+}$  (it is assumed that when further addition of  $\text{Zn}^{2+}$  does not change the emission intensity,  $K$  is the equilibrium binding constant,  $C_t$  is the total  $CI$  concentration,  $[\text{Zn}^{2+}]$  is the  $\text{Zn}^{2+}$  concentration, and  $s$  is the binding site size. Both  $K$  and  $s$  are obtained from the best fit line.

### S1.3 Cell Culture

The C6 glioma cells were grown in DMEM (High Glucose) supplemented with 10 % FBS (Fetal Bovine Serum) at 37 °C and 5 %  $\text{CO}_2$ . Cells were plated on 0.17 mm glass coverslips and allowed to adhere for 24 hours. Cells were incubated for 20 min with TPEN,  $\text{Zn}^{2+}$  and  $CI$ , respectively. Every time before the addition of species such as TPEN,  $\text{Zn}^{2+}$  and  $CI$ , Cells were washed twice by DMEM solution.

### S1.4 Fluorescence Imaging

Confocal fluorescence imaging was performed with Olympus FV1000 laser scanning microscopy and a 60x oil-immersion objective lens. Excitation of  $CI$ -loaded cells at 405 nm was carried out with a semiconductor laser. Emission was collected at 490 ~550 nm for green channel.

## S2. Supplementary results

### S2.1 Selectivity experiment

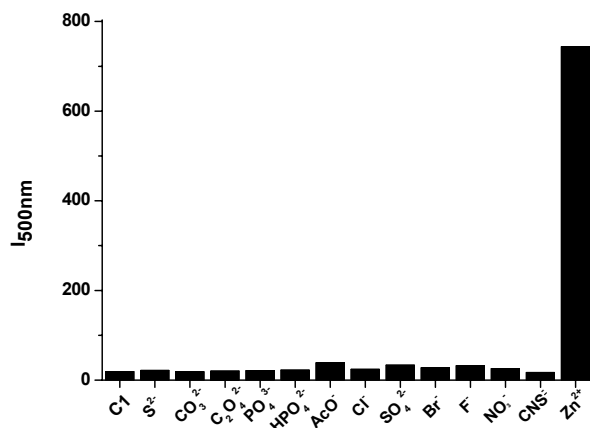

**Fig. S1.** The fluorescence responses ( $I_{500\text{nm}}$ ) of  $CI$  (20  $\mu\text{M}$ ) with various anions (800  $\mu\text{M}$ ) in Tris-HCl buffer (pH=5.0) 20 ( $\lambda_{\text{ex}} = 295 \text{ nm}$ ).

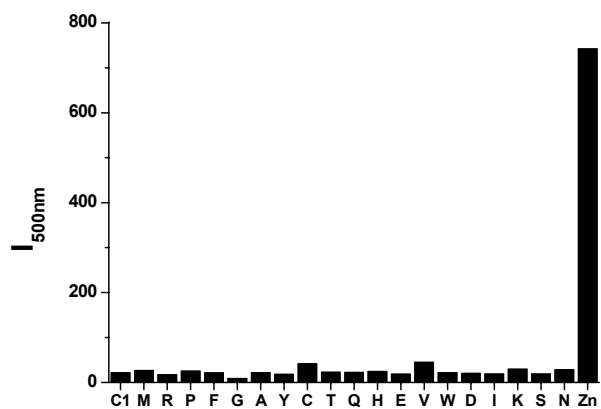

**Fig. S2.** The fluorescence responses ( $I_{500\text{nm}}$ ) of *CI* (20  $\mu\text{M}$ ) with various amino acids (800  $\mu\text{M}$ ) in Tris-HCl buffer (pH=5.0) ( $\lambda_{\text{exc}} = 295 \text{ nm}$ ).

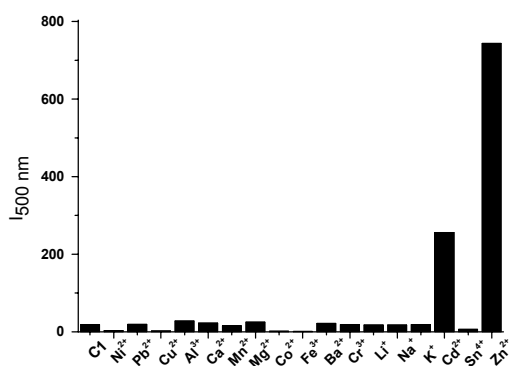

**Fig. S3.** The fluorescence responses ( $I_{500\text{nm}}$ ) of *CI* (20  $\mu\text{M}$ ) with various metal ions (800  $\mu\text{M}$ ) in Tris-HCl buffer (pH=5.0) ( $\lambda_{\text{exc}} = 295 \text{ nm}$ ).

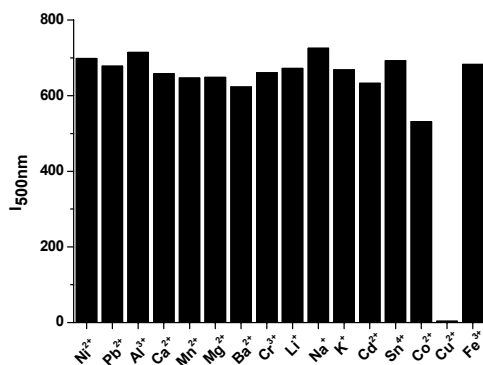

**Fig. S4.** The fluorescence responses ( $I_{500\text{nm}}$ ) of *CI* (20  $\mu\text{M}$ ) with various metal ions and  $\text{Zn}^{2+}$  in Tris-HCl buffer (pH=5.0). ( $\lambda_{\text{exc}} = 295 \text{ nm}$ ). (80 $\mu\text{M}$  for  $\text{Zn}^{2+}$ ,  $\text{Co}^{2+}$ ,  $\text{Cu}^{2+}$ ,  $\text{Fe}^{3+}$ , 800  $\mu\text{M}$  for all other cations).

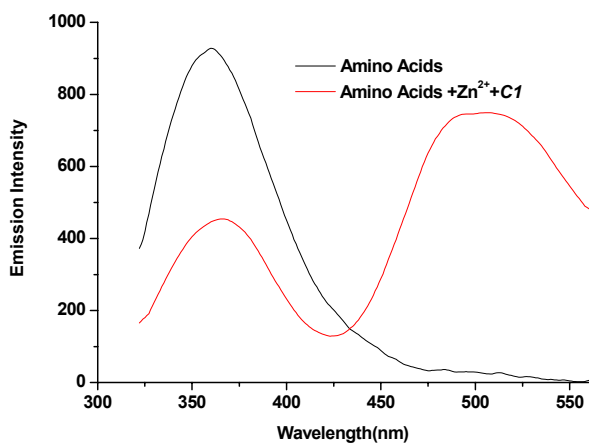

**Fig. S5.** The fluorescence responses ( $I_{500nm}$ ) of *CI* (20  $\mu$ M) with 20 amino acids and  $Zn^{2+}$  in Tris-HCl buffer (pH=5.0). ( $\lambda_{ex} = 295$  nm). (80 $\mu$ M for  $Zn^{2+}$  and amino acids).

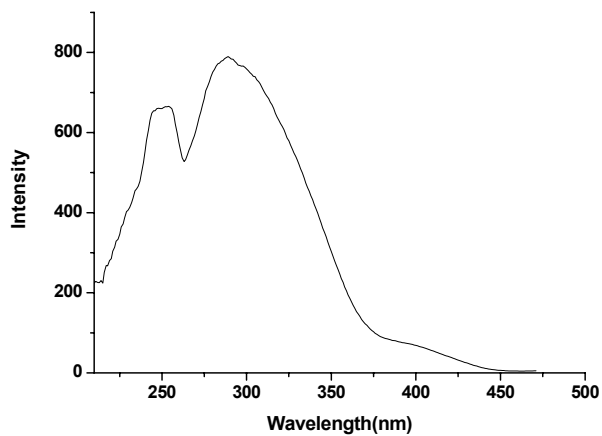

5

**Fig.S6.** Excitation spectrum of *CI*- $Zn^{2+}$

## S2.2 UV-Vis spectra:

10

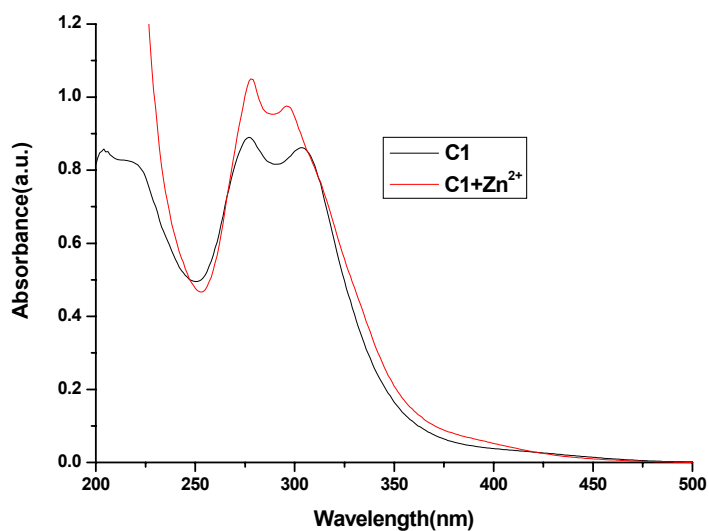

Fig.S7. The UV-Vis absorption spectra of *CI* (100  $\mu$ M) and *CI* with excess  $Zn^{2+}$ .

### S2.3 ESI-MS

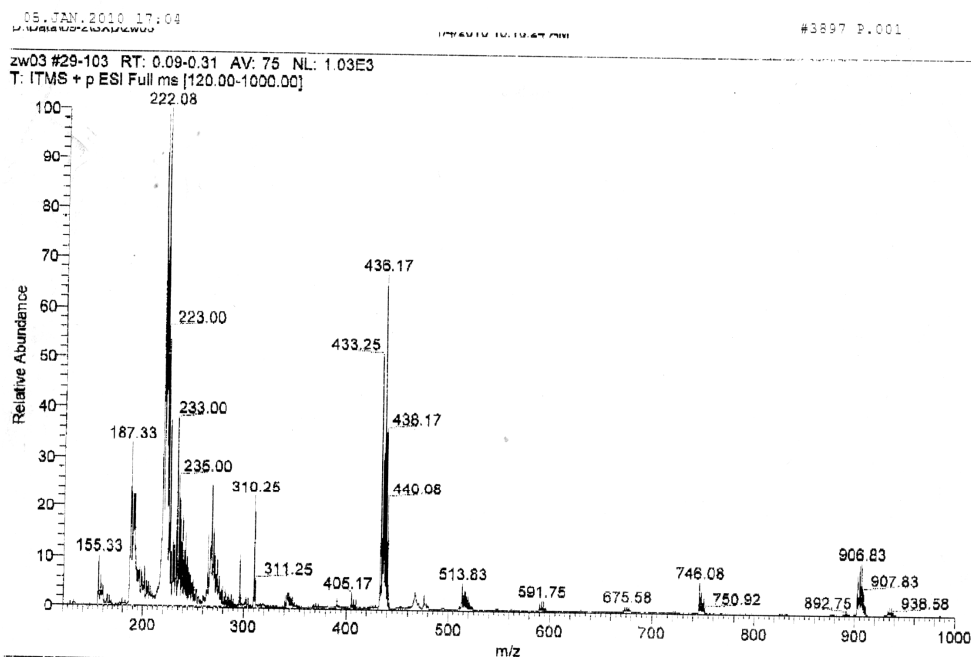

Fig. S8a ESI mass spectra of *CI*, peaks 433.25 to 440.06 for  $[HMPiP-HSeO_3H]^+$ , calc. 440.04

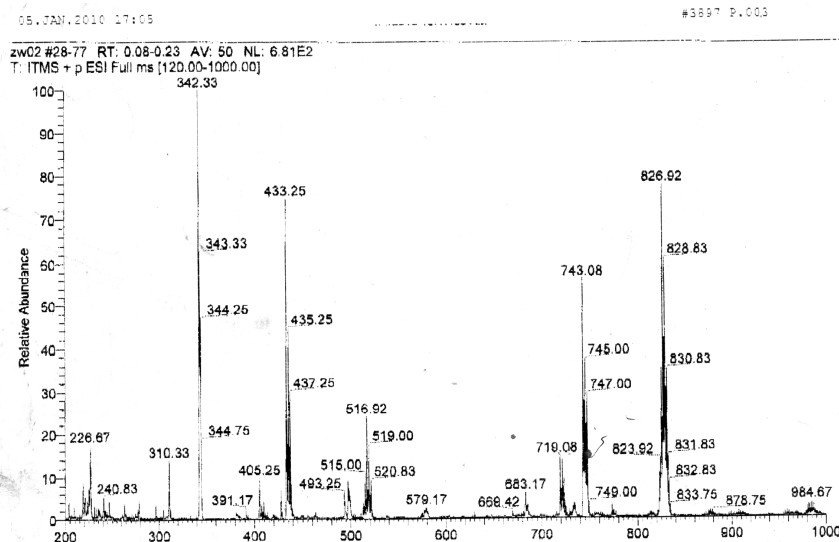

**Fig. S8b.** ESI mass spectra of *CI* upon addition of excess Zinc (III) chloride. The species with  $m/z$  828.83 observed may be assigned to  $\{[\text{Zn}(\text{CI-H})]_3^+ + 3\text{CH}_3\text{OH} + \text{CH}_3\text{O}^- + \text{H}_2\text{O}\}^{2+}$  ( $m/z = 1653.99/2 = 828.15$ ); the species with  $m/z$  743.08 may be assigned to  $\{[\text{Zn}(\text{CI-H})]_4^+ + 5\text{CH}_3\text{OH} + 3\text{H}_2\text{O}\}^{4+}$  ( $m/z = 2229.09/4 = 743.03$ ); the species with  $m/z$  433.25 may be assigned to  $\{[\text{Zn}(\text{CI-H})]_4^+ + 4\text{CH}_3\text{OH} + \text{Na}^+\}^{5+}$  ( $m/z = 2165.99/5 = 433.20$ ); the species with  $m/z$  343.33 may be assigned to  $\{[\text{Zn}(\text{CI-H})]_3^+ + 5\text{CH}_3\text{OH} + 2\text{Na}^+\}^{5+}$  ( $m/z = 1717.31/5 = 343.46$ ).

#### S2.4 Luminescence as functions of pH and time

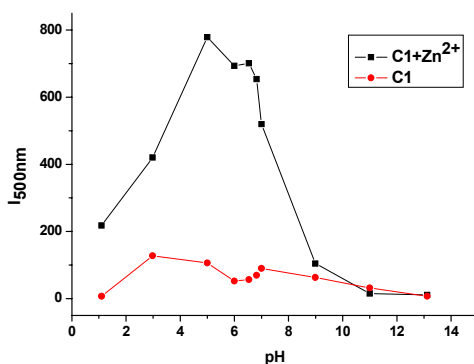

10

**Fig. S9** luminescence of *CI* (20  $\mu\text{M}$ ) at 500 nm in various pH in the absence and presence of 80  $\mu\text{M}$   $\text{Zn}^{2+}$ . The pH of the solutions was adjusted by addition of 0.1 mol L<sup>-1</sup> HCl (or 0.2 mol L<sup>-1</sup> NaOH).

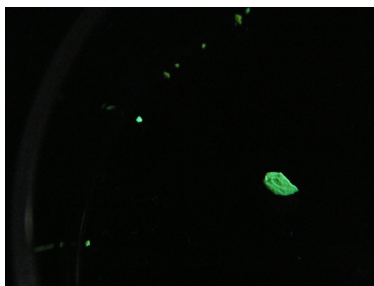

Fig. S10. Luminescence of the acidified MPIP with 1M HCl

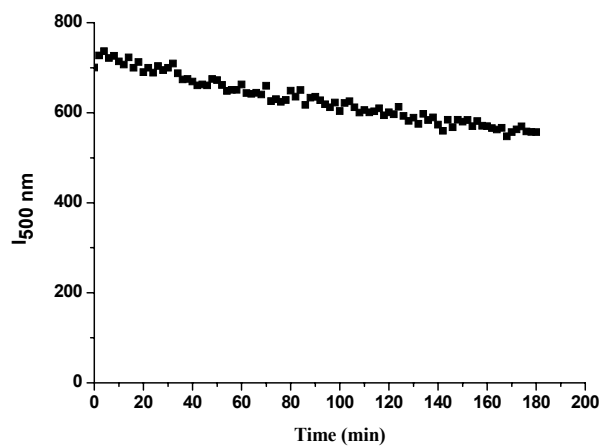

5 Fig. S11. The fluorescence intensity of  $CI-Zn^{2+}$  ( $\lambda_{ex} = 295$  nm,  $\lambda_{em} = 500$  nm) as a function of time ( $\lambda_{ex}=295$  nm).

## S2. 6 Confocal fluorescence images of C6 cells

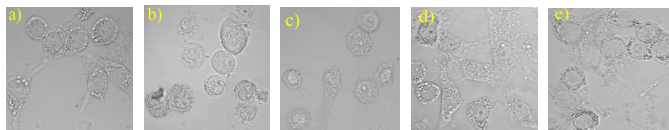

Fig. S12. Bright field of confocal fluorescence images of C6 cells in the absence (a) and presence of 50  $\mu$ M  $CI$  (b-e). Cells treated with  $CI$  in the absence (b) and presence of 8  $\mu$ M TPEN(c), and after treatment with TPEN and 10  $\mu$ M  $ZnCl_2$  (d) and 100  $\mu$ M  $ZnCl_2$  (e) subsequent treatment of the cells with 50  $\mu$ M  $CI$ .



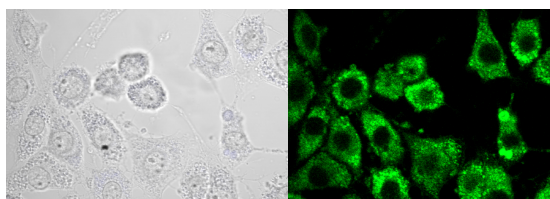

**Fig. S13.** Confocal fluorescence images of C6 cells in the presence of 50  $\mu\text{M}$  *CI* and 50  $\mu\text{M}$   $\text{ZnCl}_2$ .

**Table S1** Hydrogen binds in *CI·2H<sub>2</sub>O*

| $D-H\cdots A$                     | $D-H$ | $H\cdots A$ | $D\cdots A$ | $D-H\cdots A$ |
|-----------------------------------|-------|-------------|-------------|---------------|
| O5—H5B $\cdots$ O1                | 0.84  | 2.33        | 3.139(6)    | 161           |
| O5—H5A $\cdots$ O1 <sup>i</sup>   | 0.84  | 2.27        | 2.866(5)    | 128           |
| N3—H3B $\cdots$ O4 <sup>ii</sup>  | 0.86  | 1.93        | 2.787(5)    | 172           |
| O4—H4B $\cdots$ O5 <sup>iii</sup> | 0.85  | 2.30        | 2.936(6)    | 131           |
| O4—H4A $\cdots$ O2 <sup>iv</sup>  | 0.85  | 2.00        | 2.794(7)    | 154           |
| N1—H1A $\cdots$ N2                | 0.86  | 2.41        | 2.758(5)    | 105           |
| N1—H1A $\cdots$ O1                | 0.86  | 1.85        | 2.657(5)    | 157           |
| O3—H3 $\cdots$ O2 <sup>iv</sup>   | 0.82  | 2.10        | 2.633(6)    | 122           |
| C1—H1 $\cdots$ O5                 | 0.93  | 2.92        | 3.643(6)    | 135           |
| C3—H3A $\cdots$ O4 <sup>ii</sup>  | 0.93  | 2.57        | 3.442(6)    | 156           |
| C19—H19 $\cdots$ O4 <sup>ii</sup> | 0.93  | 2.58        | 3.484(6)    | 164           |
| C15—H15 $\cdots$ N4               | 0.93  | 2.62        | 2.927 (6)   | 100           |
| C19—H19 $\cdots$ O4 <sup>ii</sup> | 0.93  | 2.58        | 3.484 (6)   | 164           |

Symmetry codes: (i)  $-x+2, -y+1, -z+1$ ; (ii)  $x, y+1, z$ ; (iii)  $x, -y+1/2, z-1/2$ ; (iv)  $x, -y+1/2, z+1/2$ .

Reference:

- R1: W.J. Mei, J. Liu, K.C. Zheng, L.J. Lin, H. Chao, A.X. Li, F.C. Yun and L.N. Ji, *Dalton Trans.*, 2003, 1352.  
 10 R2: M.T. Carter, M. Rodriguez, and A.J. Bard, *J. Am. Chem. Soc.*, 1989, 111, 8901
